# Supplementary material
Source: publisher figshare collection journal article supplement (https://acs.figshare.com/ndownloader/files/11748353)
Supplement: Supplementary file 1 [file 11748353]

## Supporting Information

### Continuous synthesis of highly uniform noble metal nanoparticles over reduced

### graphene oxide using microreactor technology

Sha Tao<sup>†,‡</sup>, Mei Yang<sup>†,\*</sup>, Huihui Chen<sup>†,‡</sup>, Guangwen Chen<sup>†,\*</sup>

<sup>†</sup> *Dalian National Laboratory for Clean Energy, Dalian Institute of Chemical Physics, Chinese Academy of Sciences, Dalian, 116023, China*

<sup>‡</sup> *University of Chinese Academy of Sciences, Beijing, 100049, China*

The number of pages, figures and tables is 17, 11 and 4, respectively.

Corresponding authors

Mei Yang: +86-411-8437-9816 (phone), +86-411-8437-9327 (fax), yangmei@dicp.ac.cn (e-mail)

Guangwen Chen: +86-411-8437-9031 (phone), +86-411-8437-9327 (fax), gwchen@dicp.ac.cn (e-mail)

### Quantitative analysis of mixing efficiency in the plugs

Villermaux/Dushman method on the basis of a parallel competing reaction system was employed to quantitatively analyze the mixing performance in the plugs at different process parameters:

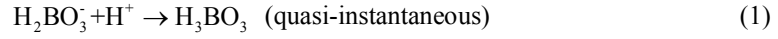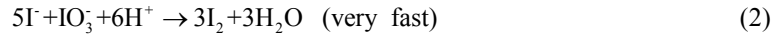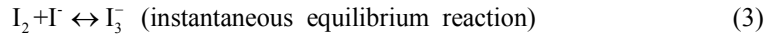

Reaction 1 is a quasi-instantaneous reaction, whereas Reaction 2 is fast but remarkably slower than Reaction 1. Reaction 3 is an instantaneous equilibrium reaction. Aqueous solution A (0.020 M  $\text{H}_2\text{SO}_4$ ) and aqueous solution B (0.25 M  $\text{H}_3\text{BO}_3$ +0.125 M  $\text{NaOH}$ +0.012 M  $\text{KI}$ +0.002 M  $\text{KIO}_3$ ) were pumped into the cross-type micromixer with the same flow rate from inlet I and III, respectively. Octane was pumped into the cross-type micromixer from inlet II. If the micromixing was ideal, aqueous solution A was instantaneously mixed with aqueous solution B, and  $\text{H}^+$  ions were consumed by  $\text{H}_2\text{BO}_3^-$  ions via Reaction 1. Otherwise,  $\text{H}^+$  ions were consumed competitively by Reaction 1 and 2, and the formed  $\text{I}_2$  further reacted with  $\text{I}^-$  ions to generate  $\text{I}_3^-$  ions according to Reaction 3. The amount of  $\text{I}_3^-$  ions was determined by the mixing efficiency and could be measured by a UV-vis spectrophotometer (METASH UV8000) at 353 nm. The worse the mixing performance was, the larger the amount of  $\text{I}_3^-$  ions was. Segregating index ( $X_s$ ) can be calculated from the amount of  $\text{I}_3^-$  ions:

$$X_s = \frac{Y}{Y_{\text{ST}}} \quad (4)$$

$$Y = \frac{2(V_1 + V_2)([\text{I}_2] + [\text{I}_3])}{V_1[\text{H}^+]_0} \quad (5)$$

$$Y_{\text{ST}} = \frac{6[\text{IO}_3^-]_0}{6[\text{IO}_3^-]_0 + [\text{H}_2\text{BO}_3^-]_0} \quad (6)$$

$Y$  is the ratio of  $\text{H}^+$  mole number consumed by Reaction 2 to the total  $\text{H}^+$  mole number injected and  $Y_{\text{ST}}$  is the value of  $Y$  in the total segregation case when the micromixing process is infinitely slow.

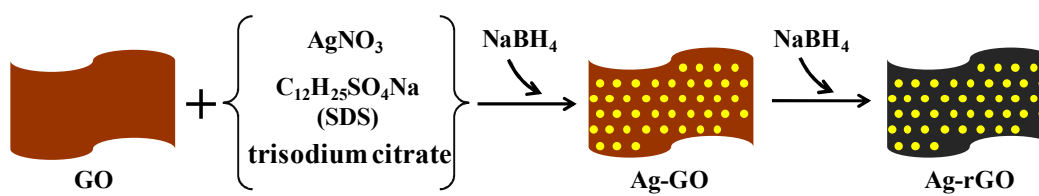

Figure S1. The schematic diagram of plausible formation mechanism of Ag-rGO composites.

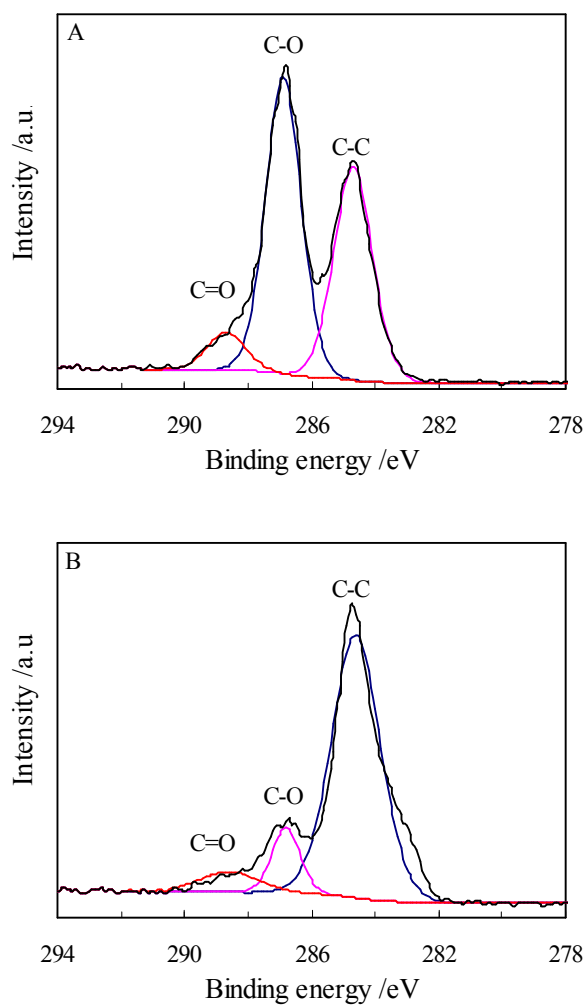

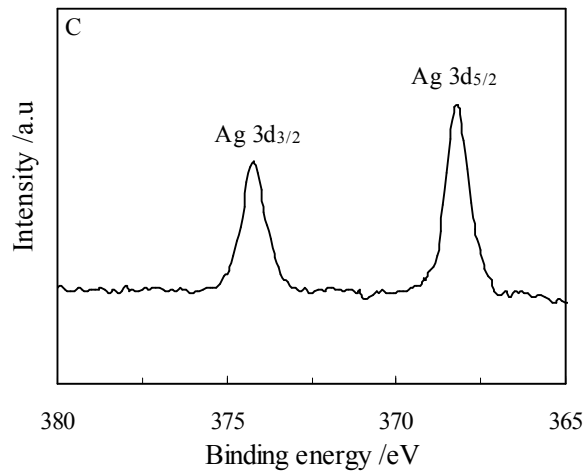

Figure S2. XPS spectra of (A) C 1s of GO (B) C 1s of Ag-rGO-S (C) Ag 3d of Ag-rGO-S. Ag-rGO-S was synthesized under the condition of  $Q_A=Q_B=0.2$  mL/min,  $Q_{\text{octane}}=0.6$  mL/min, W/O ratio=2:3,  $Q_{\text{total}}=1.0$  mL/min,  $T=40$  °C, theoretical Ag weight percentage=21.3 wt.%,  $\tau=1.38$  min.

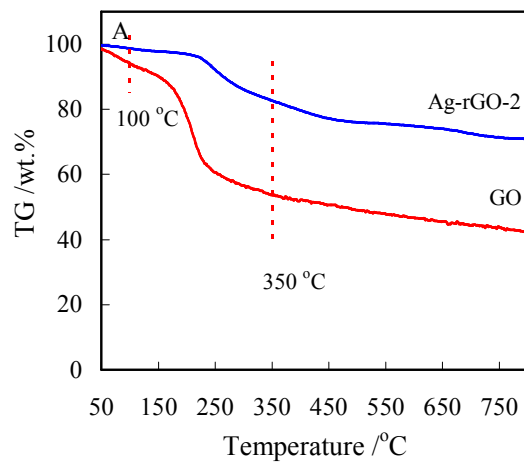

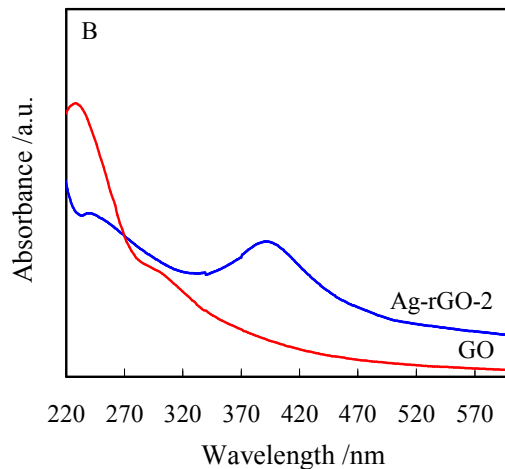

Figure S3. (A) TGA curves (B) UV-vis absorption spectra of GO and Ag-rGO-S. Ag-rGO-S was synthesized under the condition of  $Q_A=Q_B=0.2$  mL/min,  $Q_{\text{octane}}=0.6$  mL/min, W/O ratio=2:3,  $Q_{\text{total}}=1.0$  mL/min,  $T=40$  °C, theoretical Ag weight percentage=21.3 wt.%,  $\tau=1.38$  min.

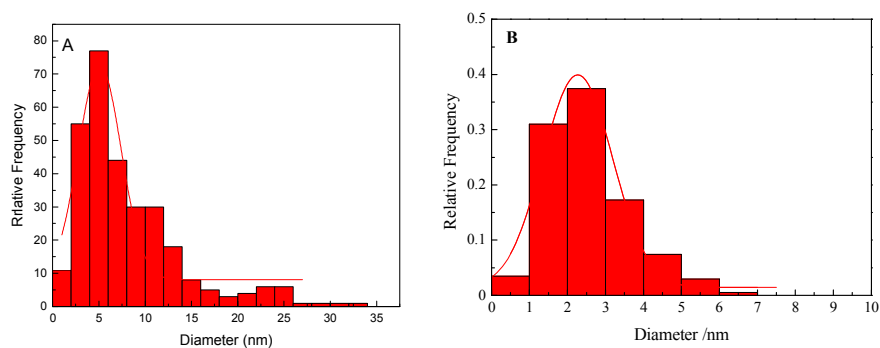

Figure S4. Particle size distribution of Ag NPs in (A) Ag-rGO-B (B) Ag-rGO-S. Ag-rGO-S was synthesized under the condition of  $Q_A=Q_B=0.2$  mL/min,  $Q_{\text{octane}}=0.6$  mL/min, W/O ratio=2:3,  $Q_{\text{total}}=1.0$  mL/min,  $T=40$  °C, theoretical Ag weight percentage=21.3 wt.%,  $\tau=1.38$  min.

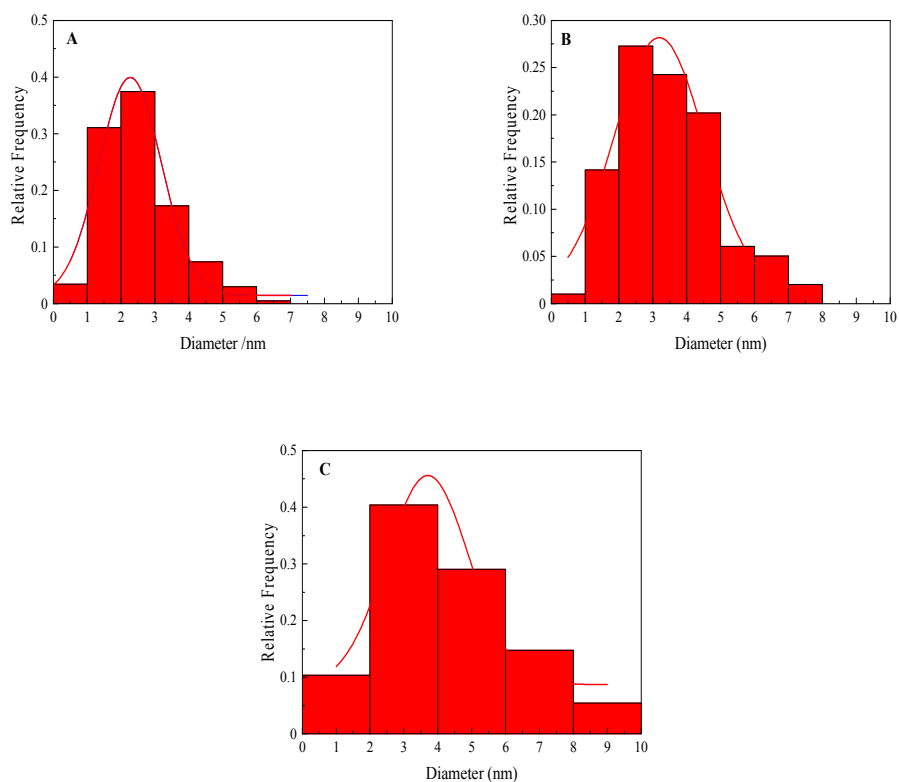

Figure S5. Particle size distribution of Ag NPs in Ag-rGO-S synthesized at different W/O ratios (A)

W/O ratio=2:3,  $Q_A=Q_B=0.2$  mL/min,  $Q_{\text{octane}}=0.6$  mL/min,  $\tau=1.38$  min (B) W/O ratio=3:2,  $Q_A=Q_B=0.3$  mL/min,  $Q_{\text{octane}}=0.4$  mL/min,  $\tau=1.36$  min (C) W/O ratio=4:1,  $Q_A=Q_B=0.4$  mL/min,  $Q_{\text{octane}}=0.2$  mL/min,  $\tau=1.35$  min.  $Q_{\text{total}}=1.0$  mL/min,  $T=40$  °C, theoretical Ag weight percentage=21.3 wt.%.

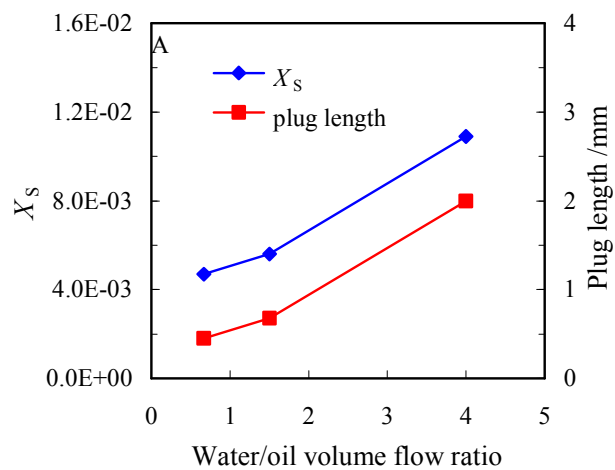

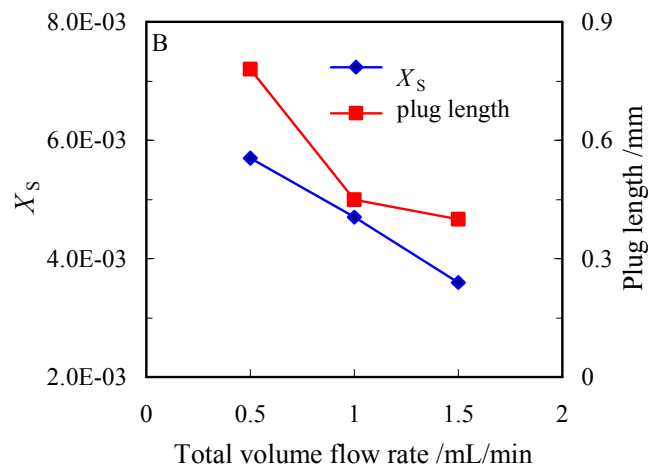

Figure S6. Plug length and  $X_s$  as a function of (A) water/oil volume flow ratio (B) total volume flow rate.

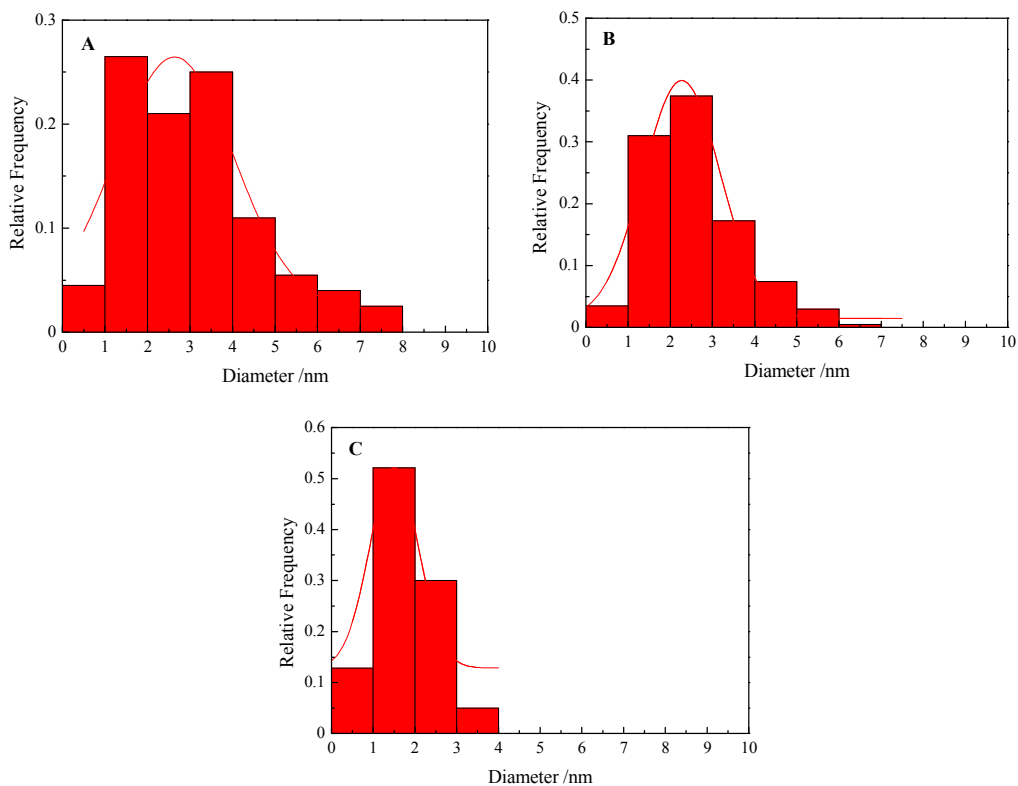

Figure S7. Particle size distribution of Ag NPs in Ag-rGO-S synthesized at different total volume flow rates (A)  $Q_{total}=0.5$  mL/min,  $Q_A=Q_B=0.1$  mL/min,  $Q_{octane}=0.3$  mL/min,  $\tau=2.76$  min (B)  $Q_{total}=1.0$  mL/min,  $Q_A=Q_B=0.2$  mL/min,  $Q_{octane}=0.6$  mL/min,  $\tau=1.38$  min (C)  $Q_{total}=1.5$  mL/min,  $Q_A=Q_B=0.3$  mL/min,  $Q_{octane}=0.9$  mL/min,  $\tau=0.92$  min. W/O ratio=2:3,  $T=40$  °C, theoretical Ag

weight percentage=21.3 wt.%.

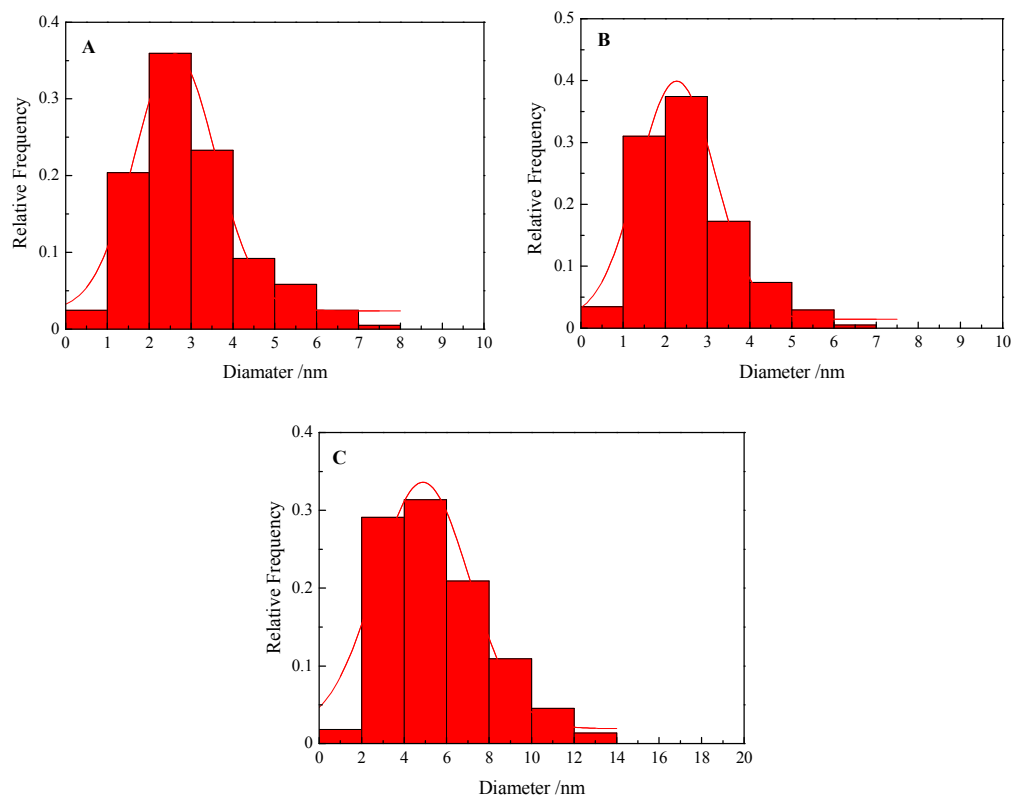

Figure S8. Particle size distribution of Ag NPs Ag-rGO-S synthesized at different synthetic temperatures (A) 20 °C (B) 40 °C (C) 60 °C.  $Q_A=Q_B=0.2$  mL/min,  $Q_{\text{octane}}=0.6$  mL/min, W/O ratio=2:3,  $Q_{\text{total}}=1.0$  mL/min, theoretical Ag weight percentage=21.3 wt.%,  $\tau=1.38$  min.

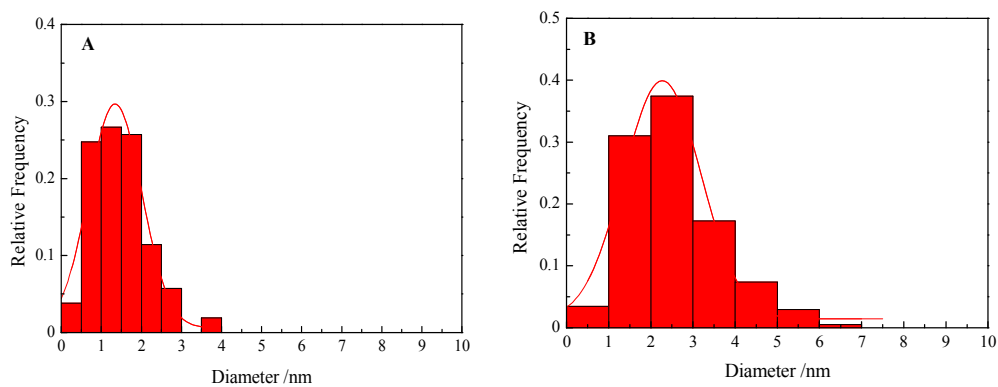



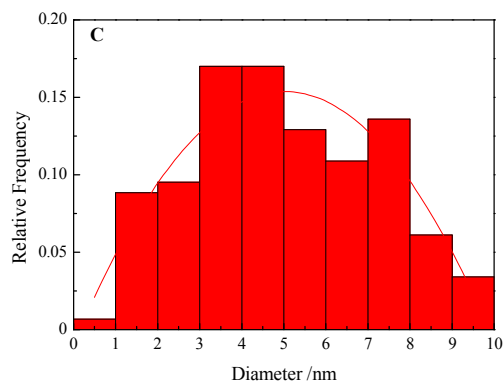

Figure S9. Particle size distribution of Ag NPs in Ag-rGO-S with different theoretical Ag weight percentages (A) 11.7 wt.% (B) 21.3 wt.% (C) 28.8 wt.%.  $Q_A=Q_B=0.2$  mL/min,  $Q_{\text{octane}}=0.6$  mL/min, W/O ratio=2:3,  $Q_{\text{total}}=1.0$  mL/min,  $T=40$  °C,  $\tau=1.38$  min.

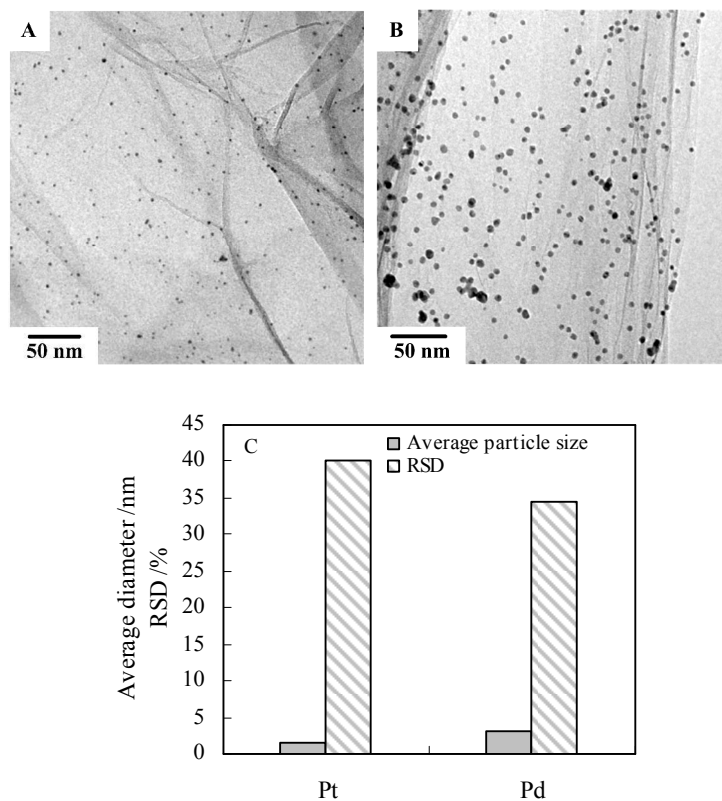

Figure S10. TEM images of (A) Pt-rGO-S (B) Pd-rGO-S; (C) average particle size and RSD of noble metal nanoparticles.  $Q_A=Q_B=0.2$  mL/min,  $Q_{\text{octane}}=0.6$  mL/min, W/O ratio=2:3,  $Q_{\text{total}}=1.0$  mL/min,  $T=40$  °C, theoretical Pt/Pd weight percentage=21.3 wt.%,  $\tau=1.38$  min.

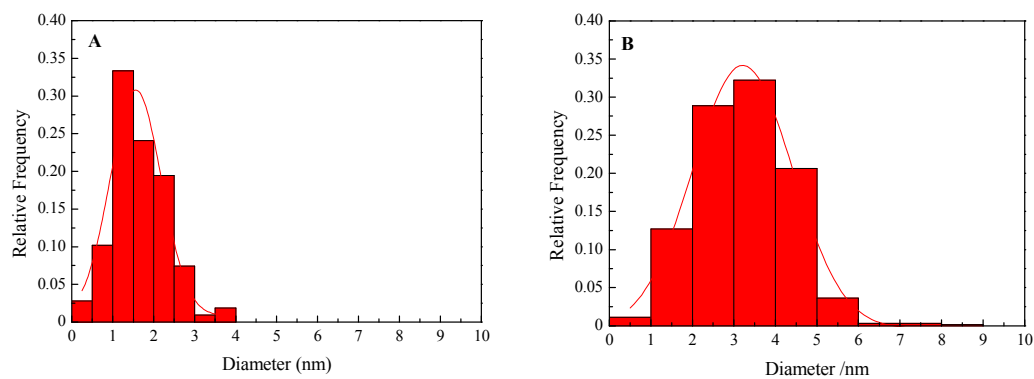

Figure S11. Particle size distribution of noble metal nanoparticles (A) Pt-rGO-S (B) Pd-rGO-S.

$Q_A=Q_B=0.2$  mL/min,  $Q_{\text{octane}}=0.6$  mL/min, W/O ratio=2:3,  $Q_{\text{total}}=1.0$  mL/min,  $T=40$  °C, theoretical

Pt/Pd weight percentage=21.3 wt.%,  $\tau=1.38$  min.

Table S1A The materials and geometries of cross-type and T-type mixer.

| Entry            | Material <sup>a</sup> | Inlet channel |               |                   |                   |                | Outlet channel |               |      |      |     |
|------------------|-----------------------|---------------|---------------|-------------------|-------------------|----------------|----------------|---------------|------|------|-----|
|                  |                       | Number        | Cross section | I.D. <sup>b</sup> | O.D. <sup>c</sup> | L <sup>d</sup> | Number         | Cross section | I.D. | O.D. | L   |
|                  |                       |               |               | mm                | mm                | cm             |                |               | mm   | mm   | cm  |
| Cross-type mixer | PTFE                  | 3             | Circular      | 0.6               | 1.6               | 1.0            | 1              | Circular      | 0.6  | 1.6  | 1.0 |
| T-type mixer     | PTFE                  | 2             | Circular      | 0.6               | 1.6               | 1.0            | 1              | Circular      | 0.6  | 1.6  | 1.0 |

Table S1B The material and geometries of capillary I and II.

| Entry       | Material | Cross section | I.D. | O.D. | L     |
|-------------|----------|---------------|------|------|-------|
|             |          |               | mm   | mm   | cm    |
| Capillary 1 | PFA      | Circular      | 0.6  | 1.6  | 400.0 |
| Capillary 2 | PFA      | Circular      | 0.6  | 1.6  | 100.0 |

<sup>a</sup> PTFE-polytetrafluoroethylene, PFA-polyfluoroalkoxy; <sup>b</sup> I.D.-inner diameter; <sup>c</sup> O.D.-outer diameter;

<sup>d</sup> L-length.

Table S2 The detailed experimental conditions predetermined in this work.

| Sample | Variable                         | Stage 1       |              |                            |                                          |                                     | Stage 2      | Synthetic temperature /°C | Theoretical noble metal weight percentage /wt. % | Residence time /min <sup>b</sup> |
|--------|----------------------------------|---------------|--------------|----------------------------|------------------------------------------|-------------------------------------|--------------|---------------------------|--------------------------------------------------|----------------------------------|
|        |                                  | $Q_A$ /mL/min | $Q_B$ mL/min | $Q_{\text{octane}}$ mL/min | Water/oil volume flow ratio <sup>a</sup> | Total flow rate mL/min <sup>a</sup> | $Q_C$ mL/min |                           |                                                  |                                  |
| Ag-rGO | water/oil volume flow ratio      | 0.2           | 0.2          | 0.6                        | 2:3                                      | 1.0                                 | 0.2          | 40                        | 21.3                                             | 1.38                             |
|        |                                  | 0.3           | 0.3          | 0.4                        | 3:2                                      | 1.0                                 | 0.3          | 40                        | 21.3                                             | 1.36                             |
|        |                                  | 0.4           | 0.4          | 0.2                        | 4:1                                      | 1.0                                 | 0.4          | 40                        | 21.3                                             | 1.35                             |
|        | total volume flow rate           | 0.1           | 0.1          | 0.3                        | 2:3                                      | 0.5                                 | 0.1          | 40                        | 21.3                                             | 2.76                             |
|        |                                  | 0.2           | 0.2          | 0.6                        | 2:3                                      | 1.0                                 | 0.2          | 40                        | 21.3                                             | 1.38                             |
|        |                                  | 0.3           | 0.3          | 0.9                        | 2:3                                      | 1.5                                 | 0.3          | 40                        | 21.3                                             | 0.92                             |
|        | synthetic temperature            | 0.2           | 0.2          | 0.6                        | 2:3                                      | 1.0                                 | 0.2          | 20                        | 21.3                                             | 1.38                             |
|        |                                  | 0.2           | 0.2          | 0.6                        | 2:3                                      | 1.0                                 | 0.2          | 40                        | 21.3                                             | 1.38                             |
|        |                                  | 0.2           | 0.2          | 0.6                        | 2:3                                      | 1.0                                 | 0.2          | 60                        | 21.3                                             | 1.38                             |
|        | Theoretical Ag weight percentage | 0.2           | 0.2          | 0.6                        | 2:3                                      | 1.0                                 | 0.2          | 40                        | 11.7                                             | 1.38                             |
|        |                                  | 0.2           | 0.2          | 0.6                        | 2:3                                      | 1.0                                 | 0.2          | 40                        | 21.3                                             | 1.38                             |
|        |                                  | 0.2           | 0.2          | 0.6                        | 2:3                                      | 1.0                                 | 0.2          | 40                        | 28.8                                             | 1.38                             |
| Pt-rGO | -                                | 0.2           | 0.2          | 0.6                        | 2:3                                      | 1.0                                 | 0.2          | 40                        | 21.3                                             | 1.38                             |
| Pd-rGO | -                                | 0.2           | 0.2          | 0.6                        | 2:3                                      | 1.0                                 | 0.2          | 40                        | 21.3                                             | 1.38                             |

<sup>a</sup> As the water/oil volume flow ratio and total volume flow rate in the first stage dramatically affected the average particle size and particle size distribution of Ag NPs in Ag-rGO-S, the water/oil volume flow ratio and total volume flow rate was calculated using the volume flow rates of solution A, B and octane in the first stage.

<sup>b</sup> The residence time was the average amount of time spent in the microchannel by the mixed solutions (stage 1: solution A + solution B + octane; stage 2: solution A + solution B + solution C + octane). The residence time was calculated by the following equation:

$$\tau = \frac{V_{\text{stage1}}}{Q_{\text{stage1}}} + \frac{V_{\text{stage2}}}{Q_{\text{stage2}}} \quad (7)$$

where  $\tau$  represents the residence time;  $V_{\text{stage1}}$  and  $V_{\text{stage2}}$  represents the volume of microchannels used in stage 1 and 2;  $Q_{\text{stage1}}$  and  $Q_{\text{stage2}}$  represents the total volume flow rates of mixed solutions in stage 1 and 2, respectively.

$$V_{\text{stage1}} = V_{\text{cross-type, outlet}} + V_{\text{capillary I}} + V_{\text{T-type, inlet}} \quad (8)$$

$$V_{\text{stage2}} = V_{\text{T-type, outlet}} + V_{\text{capillary II}} \quad (9)$$

$$Q_{\text{stage1}} = Q_A + Q_B + Q_{\text{octane}} \quad (10)$$

$$Q_{\text{stage2}} = Q_A + Q_B + Q_{\text{octane}} + Q_C \quad (11)$$

where  $V_{\text{cross-type, outlet}}$ ,  $V_{\text{capillary I}}$ ,  $V_{\text{T-type, inlet}}$ ,  $V_{\text{T-type, outlet}}$  and  $V_{\text{capillary II}}$  is the volume of cross-type mixer's outlet channel, capillary I, T-type mixer's inlet channel, T-type mixer's outlet channel and capillary II;  $Q_A$ ,  $Q_B$ ,  $Q_C$  and  $Q_{\text{octane}}$  is the flow rate of solution A, B, C and octane. The residence time under different conditions was added into the revised manuscript.

Table S3 The space time yields (*STY*) of Ag-rGO composites synthesized in continuous mode and batch mode.

| Operation mode | $m_{\text{Ag-rGO}}/\text{mg}^{\text{a}}$ | $\tau/\text{min}$ | $V/\text{mL}$    | $STY^{\text{b}}$<br>/ $\text{g}\cdot\text{h}^{-1}\cdot\text{L}^{-1}$ |
|----------------|------------------------------------------|-------------------|------------------|----------------------------------------------------------------------|
| continuous     | 0.07                                     | 1.38              | 1.42             | 2.15                                                                 |
| batch          | 12.7                                     | 60                | 110 <sup>c</sup> | 0.12                                                                 |

<sup>a</sup> Ag theoretical weight percentages of Ag-rGO composites synthesized in continuous mode and batch mode were both 21.3%. The continuous mode was carried out under the experimental condition of  $Q_{\text{A}}=Q_{\text{B}}=0.2$  mL/min,  $Q_{\text{octane}}=0.6$  mL/min, synthetic temperature= 40 °C.

<sup>b</sup> The equation of the space time yield was defined as:

$$STY = \frac{m_{\text{Ag-rGO}}}{V\tau} \quad (12)$$

where  $m_{\text{Ag-rGO}}$ ,  $V$  and  $\tau$  are the theoretical mass of Ag-rGO composite, volume of reaction occurring, and residence time, respectively.

<sup>c</sup> The final volume of mixed solution was used for the calculation of *STY*.

Table S4 The average particle sizes of Ag NPs in Ag-rGO nanocomposites synthesized via solution-phase reduction.

| Sample  | Ag precursor         | Reducing agent    | Solvent | Average particle size /nm | Ref. |
|---------|----------------------|-------------------|---------|---------------------------|------|
| Ag-rGO  | Silica coated Ag NPs | Hydrazine hydrate | Water   | ~5 nm                     | 1    |
| Ag/rGO  | AgNO <sub>3</sub>    | -                 | Water   | ~5 nm                     | 2    |
| AgNP-GO | AgNO <sub>3</sub>    | Vitamin C         | Water   | 15-55 nm                  | 3    |
| Ag/rGO  | AgNO <sub>3</sub>    | DMF               | DMF     | 20-40 nm                  | 4    |
| Ag-rGO  | AgNO <sub>3</sub>    | NaBH <sub>4</sub> | Water   | 5-60 nm                   | 5    |
| AgNP-GE | AgNO <sub>3</sub>    | NaBH <sub>4</sub> | Water   | ~10 nm                    | 6    |

|        |                   |                   |                               |            |           |
|--------|-------------------|-------------------|-------------------------------|------------|-----------|
| Ag/GN  | AgNO <sub>3</sub> | glucose           | Supercritical CO <sub>2</sub> | ~5 nm      | 7         |
| Ag-rGO | AgNO <sub>3</sub> | Ethylene glycol   | Water                         | ~4.7 nm    | 8         |
| Ag-rGO | AgNO <sub>3</sub> | NaBH <sub>4</sub> | Water                         | 1.5-5.6 nm | This work |

## References

- (1) Bhunia, S. K.; Jana, N. R. Reduced Graphene Oxide-Silver Nanoparticle Composite as Visible Light Photocatalyst for Degradation of Colorless Endocrine Disruptors. *ACS Appl. Mater. Inter.* **2014**, *6*, 20085-20092.
- (2) Han, X. W.; Meng, X. Z.; Zhang, J.; Wang, J. X.; Huang, H. F.; Zeng, X. F.; Chen, J. F. Ultrafast Synthesis of Silver Nanoparticle Decorated Graphene Oxide by a Rotating Packed Bed Reactor. *Ind. Eng. Chem. Res.* **2016**, *55*, 11622-11630.
- (3) Hui, K. S.; Hui, K. N.; Dinh, D. A.; Tsang, C. H.; Cho, Y. R.; Zhou, W.; Hong, X.; Chun, H. H. Green Synthesis of Dimension-Controlled Silver Nanoparticle-Graphene Oxide with in Situ Ultrasonication. *Acta Mater.* **2014**, *64*, 326-332.
- (4) Dutta, S.; Ray, C.; Sarkar, S.; Pradhan, M.; Negishi, Y. T. P. Silver Nanoparticle Decorated Reduced Graphene Oxide (rGO) Nanosheet: A Platform for SERS Based Low-Level Detection of Uranyl Ion. *Appl. Mater. Inter.* **2013**, *5*, 8724-8732.
- (5) Murphy, S.; Huang, L.; Kamat, P. V. Reduced Graphene Oxide-Silver Nanoparticle Composite as an Active SERS Material. *J. Phys. Chem. C* **2013**, *117*, 4740-4747.
- (6) Zhou, Y.; Yang, J.; He, T.; Shi, H.; Cheng, X.; Lu, Y. Highly Stable and Dispersive Silver Nanoparticle-Graphene Composites by a Simple and Low-Energy-Consuming Approach and Their Antimicrobial Activity. *Small* **2013**, *9*, 3445-3454.
- (7) Yuan, M.; Su, F.; Chen, Y. Supercriticalfluid Synthesis and Tribological Applications of Silver

Nanoparticle-Decorated Graphene in Engine Oil Nanofluid. *Sci. Rep-UK* **2016**, *6*, 31246.

(8) Kumar, S.; Selvaraj, C.; Scanlon, L. G.; Munichandraiah, N. Ag Nanoparticles-Anchored Reduced Graphene Oxide Catalyst for Oxygen Electrode Reaction in Aqueous Electrolytes and also a Non-Aqueous Electrolyte for Li-O<sub>2</sub> Cells *Phys. Chem. Chem. Phys.* **2014**, *16*, 22830-22840.
